# Supplementary figures and images for: Eucalyptus woodlot adoption and its determinants in the Mecha District, Northern Ethiopia
Source: Frontiers journal article supplement (doi:10.3389/ffgc.2023.1111301), 2023-03-30

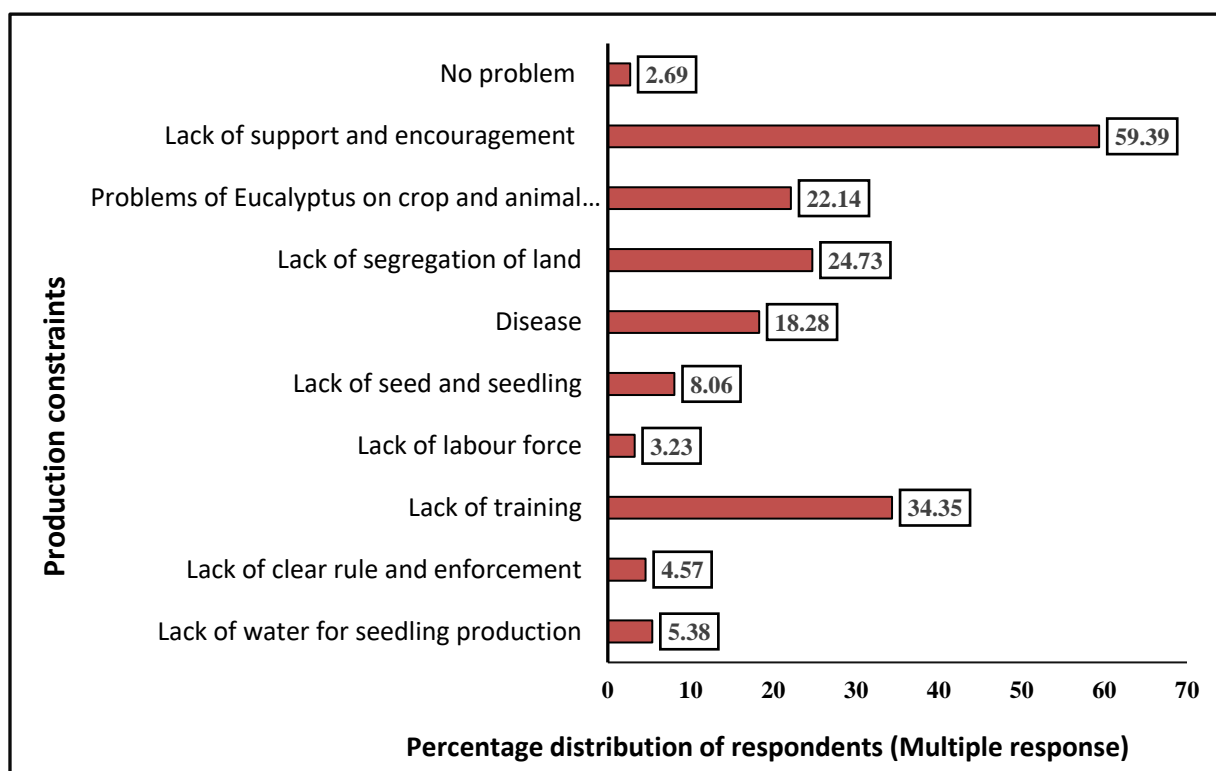

**Supplementary Appendix Figure A1.** Production constraints of *Eucalyptus*. Source field survey (2018).

Supplement: Image_1.pdf [file Image_1.pdf]
